# Supplementary material
Source: publisher figshare collection journal article supplement (https://karger.figshare.com/ndownloader/files/24493307)
Supplement: Supplementary file 1 [file 24493307]

## Sheet: M2_macrophages
Table 1. Signature genes used for M2 macrophage relative enumeration
ADAMDEC1
AIF1
ALOX15
CCL13
CCL14
CCL18
CCL23
CCL8
CD209
CD4
CD68
CFP
CHI3L1
CLEC10A
CLEC4A
CLIC2
CRYBB1
EBI3
FAM198B
FES
FRMD4A
FZD2
GGT5
GSTT1
HRH1
HTR2B
MS4A6A
NME8
NPL
P2RY13
PDCD1LG2
RENBP
SIGLEC1
SLC15A3
TLR8
TREM2
WNT5B
